# Supplementary material for: Transcriptionally induced enhancers in the macrophage immune response to Mycobacterium tuberculosis infection
Source: BMC Genomics. 2019 Jan 22;20:71. doi: 10.1186/s12864-019-5450-6 (PMC6341744; doi:10.1186/s12864-019-5450-6)
Supplement: Supplementary file 7 — Table S3. Induced enhancers with associated target DEGs up-regulated at 4 h post infection. (XLSX 38 kb) [file 12864_2019_5450_MOESM7_ESM.xlsx]

## Sheet: Table_S3
Gene Name	Mean gene expression, 0 h, TPM	Mean gene expression, 4 h infected, TPM	Enhancer	Mean enhancer expression, 0 h, TPM	Mean enhancer expression, 4 h infected, TPM	Super Enhancer	Corr. Coef	P-value
5330426P16Rik	37.4	100.49	chr16:50586220..50586621	0.03	1.11		0.37	0.27
9930022D16Rik	0.59	8.12	chr11:109366844..109367245	0.36	4.66	chr11:109361361..109440261	0.63	0.04
AA467197	1.75	312.1	chr2:122408925..122409326	0.19	3.45	chr2:122407505..122454314	0.6	0.06
Abi1	94.1	182.61	chr2:24304532..24304933	0	1.44	chr2:24295006..24367810	0.36	0.27
Abi1	94.1	182.61	chr2:24341391..24341792	0.32	4.66	chr2:24295006..24367810	0.54	0.09
Acp5	29.24	59.27	chr9:21601080..21601481	0.08	1.36		0.21	0.53
Adm	0.1	21.95	chr7:110164087..110164488	0.06	1.23		0.35	0.29
Adora2a	2.34	59.94	chr10:75326565..75326966	0	1.07		0.89	0
Adora2b	13.62	184.45	chr11:62184954..62185355	0.1	1.79		0.21	0.55
Adora2b	13.62	184.45	chr11:62187090..62187491	0.03	1.41		0.68	0.03
Alcam	93.9	264.23	chr16:52425904..52426305	0.13	6.05	chr16:52402517..52470702	0.81	0
Ampd3	38.9	198.86	chr7:110164087..110164488	0.06	1.23		0.29	0.38
Ankrd17	24.1	49.11	chr5:90875989..90876390	0.03	2.03	chr5:90853292..90909330	0.23	0.49
Ankrd17	24.1	49.11	chr5:90880890..90881291	0	1.31	chr5:90853292..90909330	0.55	0.08
Ankrd17	24.1	49.11	chr5:90900213..90900614	0	1.78	chr5:90853292..90909330	0.87	0
Ankrd17	24.1	49.11	chr5:90900701..90901102	0	2.4	chr5:90853292..90909330	0.67	0.02
Ankrd33b	16.19	83.11	chr15:31349023..31349424	0	3.22	chr15:31304267..31367770	0.93	0
Anxa11	52.54	114.08	chr14:25496223..25496624	0	1.52	chr14:25452724..25530808	0.77	0.01
Anxa5	413.57	996.66	chr3:36468979..36469380	0.11	12.28	chr3:36467597..36482055	0.55	0.09
Apbb3	8.59	52.65	chr18:36713377..36713778	0.24	6.25	chr18:36670073..36760404	0.77	0.01
Apbb3	8.59	52.65	chr18:36723611..36724012	0	2.3	chr18:36670073..36760404	0.69	0.02
Arl4a	14.39	34.5	chr12:40016931..40017332	0	1.15		0.72	0.01
Arl8a	169.66	367.13	chr1:135813078..135813479	0	3.54		0.87	0
Arrdc4	18.54	151.11	chr7:68667651..68668052	0	1.15		0.72	0.01
Asf1a	10.61	29.21	chr10:53285103..53285504	0.05	1.75		0.7	0.02
Atf3	164.66	1228.23	chr1:191180436..191180837	0.15	2.38	chr1:191180349..191201638	0.54	0.09
Atf3	164.66	1228.23	chr1:191189816..191190217	0.14	2.91	chr1:191180349..191201638	0.65	0.04
Atf3	164.66	1228.23	chr1:191193641..191194042	0	1.3	chr1:191180349..191201638	0.8	0
Atf3	164.66	1228.23	chr1:191239599..191240000	0.08	3.1	chr1:191216017..191299892	0.76	0.01
Atf3	164.66	1228.23	chr1:191439670..191440071	0	1.09		0.45	0.16
Atp11b	29.47	91.42	chr3:36468979..36469380	0.11	12.28	chr3:36467597..36482055	0.61	0.05
Atp1b3	171.75	402.15	chr9:96393119..96393520	0.13	2.83	chr9:96363547..96399988	0.74	0.01
AW112010	167.73	2546.17	chr19:11494532..11494933	0.16	2.07		0.68	0.02
AW112010	167.73	2546.17	chr19:11809651..11810052	0	1.14		0.26	0.43
Batf2	7.74	50.25	chr19:5925501..5925902	0.08	2.83		0.53	0.1
Batf2	7.74	50.25	chr19:5931597..5931998	0.08	1.32		0.47	0.15
BC016423	10.75	35.76	chr13:5787095..5787496	0	1.84	chr13:5767829..5789713	0.83	0
BC016423	10.75	35.76	chr13:5789313..5789714	0.1	8	chr13:5767829..5789713	0.87	0
BC016423	10.75	35.76	chr13:5802211..5802612	0.05	2.26		0.65	0.03
Birc6	56.57	105.03	chr17:74523187..74523588	0.03	1.07		0.64	0.03
Blcap	39.04	89.68	chr2:157407585..157407986	0	1.63	chr2:157362899..157428848	0.57	0.07
Blcap	39.04	89.68	chr2:157425669..157426070	0.03	1.09	chr2:157362899..157428848	0.2	0.56
Blcap	39.04	89.68	chr2:157428230..157428631	0	1.2	chr2:157362899..157428848	0.45	0.17
Bst1	30.7	104.72	chr5:43865294..43865695	0.1	1.54		0.39	0.24
Bst1	30.7	104.72	chr5:43866391..43866792	0	1.29		0.36	0.28
Bst1	30.7	104.72	chr5:43881862..43882263	0.1	4.11		0.49	0.12
Bst1	30.7	104.72	chr5:43885022..43885423	0	1.61		0.32	0.34
C030046E11Rik	43.59	108.18	chr19:29176475..29176876	0.05	1.23	chr19:29126488..29189256	0.46	0.15
C030046E11Rik	43.59	108.18	chr19:29253796..29254197	0.1	2.27	chr19:29201652..29256841	0.35	0.29
C030046E11Rik	43.59	108.18	chr19:29371827..29372228	0.03	1.28	chr19:29354989..29448568	0.33	0.31
C030046E11Rik	43.59	108.18	chr19:29493287..29493688	0	2.23	chr19:29461249..29540485	0.74	0.01
Cacna1b	0.32	3.12	chr2:24304532..24304933	0	1.44	chr2:24295006..24367810	0.79	0
Cacna1b	0.32	3.12	chr2:24341391..24341792	0.32	4.66	chr2:24295006..24367810	0.75	0.01
Casp4	54.82	367.65	chr9:5311690..5312091	0.09	1.86		0.08	0.82
Ccdc25	16.72	70.44	chr14:66279516..66279917	0.27	3.41	chr14:66175780..66281301	0.21	0.55
Ccdc86	27.41	80.7	chr19:10845353..10845754	0.2	8.41	chr19:10831236..10845848	0.04	0.92
Ccl3	154.46	17388.7	chr11:83534208..83534609	0.03	1.99	chr11:83509514..83619461	0.53	0.09
Ccl3	154.46	17388.7	chr11:83534669..83535070	0	2.61	chr11:83509514..83619461	0.51	0.11
Ccl3	154.46	17388.7	chr11:83536277..83536678	0	1.67	chr11:83509514..83619461	0.48	0.14
Ccl3	154.46	17388.7	chr11:83543929..83544330	0	1.11	chr11:83509514..83619461	0.51	0.11
Ccl3	154.46	17388.7	chr11:83550341..83550742	0	1.56	chr11:83509514..83619461	0.43	0.19
Ccl4	58.09	13283.7	chr11:83534208..83534609	0.03	1.99	chr11:83509514..83619461	0.36	0.28
Ccl4	58.09	13283.7	chr11:83534669..83535070	0	2.61	chr11:83509514..83619461	0.15	0.66
Ccl4	58.09	13283.7	chr11:83536277..83536678	0	1.67	chr11:83509514..83619461	0.2	0.56
Ccl4	58.09	13283.7	chr11:83543929..83544330	0	1.11	chr11:83509514..83619461	0.27	0.41
Ccl9	876.99	2729.88	chr11:83534208..83534609	0.03	1.99	chr11:83509514..83619461	0.79	0
Ccl9	876.99	2729.88	chr11:83534669..83535070	0	2.61	chr11:83509514..83619461	0.57	0.07
Ccl9	876.99	2729.88	chr11:83536277..83536678	0	1.67	chr11:83509514..83619461	0.63	0.04
Ccl9	876.99	2729.88	chr11:83550341..83550742	0	1.56	chr11:83509514..83619461	0.74	0.01
Cd14	962.16	6706.39	chr18:36713377..36713778	0.24	6.25	chr18:36670073..36760404	0.64	0.04
Cd14	962.16	6706.39	chr18:36723611..36724012	0	2.3	chr18:36670073..36760404	0.66	0.03
Cd200	8.84	116.85	chr16:45372514..45372915	0	1.26	chr16:45349557..45421532	0.06	0.86
Cd200	8.84	116.85	chr16:45375798..45376199	0	2.38	chr16:45349557..45421532	0.52	0.11
Cd274	80.93	2092.53	chr19:29176475..29176876	0.05	1.23	chr19:29126488..29189256	0.29	0.39
Cd274	80.93	2092.53	chr19:29253796..29254197	0.1	2.27	chr19:29201652..29256841	0.16	0.63
Cd274	80.93	2092.53	chr19:29371827..29372228	0.03	1.28	chr19:29354989..29448568	0.05	0.88
Cd274	80.93	2092.53	chr19:29493287..29493688	0	2.23	chr19:29461249..29540485	0.31	0.35
Cd38	24.86	356.81	chr5:43865294..43865695	0.1	1.54		0.21	0.53
Cd38	24.86	356.81	chr5:43866391..43866792	0	1.29		0.35	0.29
Cd38	24.86	356.81	chr5:43881862..43882263	0.1	4.11		0.39	0.24
Cd38	24.86	356.81	chr5:43885022..43885423	0	1.61		0.55	0.08
Cd40	5.62	904.16	chr2:165042996..165043397	0.1	2.71		0.76	0.01
Cd69	8.27	429.97	chr6:129171714..129172115	0	1.38	chr6:129153858..129254656	0.72	0.01
Cd83	74.31	581.18	chr13:43787285..43787686	0.03	1.38	chr13:43765089..43807711	0.73	0.01
Cdkn1a	190.9	2207.28	chr17:29053776..29054177	0	1.06		0.23	0.51
Cdkn1a	190.9	2207.28	chr17:29393637..29394038	0.1	5.13		0.35	0.3
Cdkn1a	190.9	2207.28	chr17:29394116..29394517	0	1.41	chr17:29394048..29395809	0.05	0.9
Cdkn1a	190.9	2207.28	chr17:29441994..29442395	0.11	2.04	chr17:29431937..29447550	0.47	0.14
Cdyl2	18.33	32.51	chr8:116552271..116552672	0	1.47		0.39	0.23
Cep85l	7.28	21.54	chr10:53285103..53285504	0.05	1.75		0.66	0.03
Cgref1	0.55	3.9	chr5:29861451..29861852	0.03	1.53		0.08	0.82
Clcn7	84.86	315.86	chr17:25140246..25140647	0	2.03		0.83	0
Clic4	104.08	1099.48	chr4:135312667..135313068	0.11	2.96		0.48	0.14
Cln5	66.84	228.02	chr14:103014778..103015179	0	4.71		0.65	0.03
Cln5	66.84	228.02	chr14:103015885..103016286	0.05	3.13		0.91	0
Cln5	66.84	228.02	chr14:103033398..103033799	0.93	13.35	chr14:103033318..103110163	0.91	0
Cln5	66.84	228.02	chr14:103034101..103034502	0.08	1.34	chr14:103033318..103110163	0.21	0.55
Cln5	66.84	228.02	chr14:103037012..103037413	1.48	36.68	chr14:103033318..103110163	0.81	0
Cln5	66.84	228.02	chr14:103039353..103039754	0.05	4.89	chr14:103033318..103110163	0.66	0.03
Col27a1	0	3.41	chr4:63407673..63408074	0	1.37	chr4:63385234..63430063	0.26	0.43
Cox17	184.38	534.11	chr16:38395140..38395541	0	1.32	chr16:38346748..38476097	0.28	0.41
Creb5	62.57	360.58	chr6:53626056..53626457	0	1.12		0.69	0.02
Ctsl	2317.56	4809.44	chr13:64413821..64414222	0	1.3	chr13:64360386..64439500	0.21	0.54
Cxcl1	38.04	10644.2	chr5:90875989..90876390	0.03	2.03	chr5:90853292..90909330	0.78	0
Cxcl1	38.04	10644.2	chr5:90880890..90881291	0	1.31	chr5:90853292..90909330	0.69	0.02
Cxcl1	38.04	10644.2	chr5:90900213..90900614	0	1.78	chr5:90853292..90909330	0.56	0.07
Cxcl1	38.04	10644.2	chr5:90900701..90901102	0	2.4	chr5:90853292..90909330	0.8	0
Cxcl10	40.67	2977.83	chr5:92369052..92369453	0	1.41	chr5:92348788..92394328	0.8	0
Cxcl11	2.66	590.17	chr5:92369052..92369453	0	1.41	chr5:92348788..92394328	0.77	0.01
Cxcl2	82.01	18964.6	chr5:90875989..90876390	0.03	2.03	chr5:90853292..90909330	0.77	0.01
Cxcl2	82.01	18964.6	chr5:90880890..90881291	0	1.31	chr5:90853292..90909330	0.71	0.02
Cxcl2	82.01	18964.6	chr5:90900213..90900614	0	1.78	chr5:90853292..90909330	0.75	0.01
Cxcl2	82.01	18964.6	chr5:90900701..90901102	0	2.4	chr5:90853292..90909330	0.9	0
Cxcl3	7.93	1411.52	chr5:90875989..90876390	0.03	2.03	chr5:90853292..90909330	0.31	0.35
Cxcl3	7.93	1411.52	chr5:90880890..90881291	0	1.31	chr5:90853292..90909330	0.57	0.07
Cxcl3	7.93	1411.52	chr5:90900213..90900614	0	1.78	chr5:90853292..90909330	0.19	0.57
Cxcl3	7.93	1411.52	chr5:90900701..90901102	0	2.4	chr5:90853292..90909330	0.26	0.45
Cxcl5	0.12	5.7	chr5:90880890..90881291	0	1.31	chr5:90853292..90909330	0.38	0.25
Cxcl9	0.43	1702.99	chr5:92369052..92369453	0	1.41	chr5:92348788..92394328	0.56	0.07
Denr	55.06	365.36	chr5:123862627..123863028	0	1.15	chr5:123858496..123915356	0.79	0
Denr	55.06	365.36	chr5:124496841..124497242	0.05	1.37	chr5:124442557..124498566	0.6	0.05
Dock4	31.02	99.32	chr12:40555096..40555497	0.05	3.21	chr12:40536184..40586195	0.34	0.3
Dock4	31.02	99.32	chr12:40559109..40559510	0.06	1.39	chr12:40536184..40586195	0.77	0.01
Dot1l	28.02	105.51	chr10:80939652..80940053	0.06	1.28	chr10:80921882..80943397	0.78	0
Dtwd1	4.57	11.4	chr2:126231702..126232103	0.03	1.93		0.78	0
Dtwd1	4.57	11.4	chr2:126310085..126310486	0	1.1		0.91	0
Dtx2	17.57	74.82	chr5:136034913..136035314	0.1	3.15		0.54	0.09
Edn1	0.2	665.91	chr13:42244281..42244682	0	1.08	chr13:42244288..42262608	0.37	0.27
Edn1	0.2	665.91	chr13:42245593..42245994	0	3.76	chr13:42244288..42262608	0.74	0.01
Edn1	0.2	665.91	chr13:42248616..42249017	0	1.67	chr13:42244288..42262608	0.92	0
Eea1	48.01	150.48	chr10:96094001..96094402	0	3.93		0.09	0.8
Ehd1	191.36	1181	chr19:5925501..5925902	0.08	2.83		0.8	0.01
Ehd1	191.36	1181	chr19:5931597..5931998	0.08	1.32		0.55	0.08
Eif4e2	102.56	196.54	chr1:87180276..87180677	0.05	1.29		0.69	0.02
Eif4g2	978.71	2448.45	chr7:110164087..110164488	0.06	1.23		0.13	0.71
Etv3	32.37	98.64	chr3:87518431..87518832	0.16	4.41	chr3:87487862..87525792	0.79	0
Etv3	32.37	98.64	chr3:87521836..87522237	0.1	1.12	chr3:87487862..87525792	0.33	0.32
Ezr	16.25	138.64	chr17:7163895..7164296	0	1.42		0.82	0
Fam102b	38.53	272.28	chr3:108990524..108990925	0.03	1.24		0.6	0.05
Fam102b	38.53	272.28	chr3:109025692..109026093	0.08	1.37		0.47	0.15
Fam102b	38.53	272.28	chr3:109051925..109052326	0	1.27		0.58	0.06
Fam46c	12.37	104.3	chr3:100439052..100439453	0.03	2.78		0.67	0.03
Fbxl3	28.31	65.02	chr14:103014778..103015179	0	4.71		0.26	0.43
Fbxl3	28.31	65.02	chr14:103015885..103016286	0.05	3.13		0.81	0
Fbxl3	28.31	65.02	chr14:103033398..103033799	0.93	13.35	chr14:103033318..103110163	0.85	0
Fbxl3	28.31	65.02	chr14:103034101..103034502	0.08	1.34	chr14:103033318..103110163	0.41	0.21
Fbxl3	28.31	65.02	chr14:103037012..103037413	1.48	36.68	chr14:103033318..103110163	0.77	0.01
Fbxl3	28.31	65.02	chr14:103039353..103039754	0.05	4.89	chr14:103033318..103110163	0.22	0.51
Foxf2	0	1.77	chr13:30834295..30834696	0.08	1.35		0.62	0.04
Furin	101.49	300.93	chr7:80774208..80774609	0.03	1.12	chr7:80753807..80789884	0.7	0.02
Fzd1	1.4	43.87	chr5:4528393..4528794	0	1.91		0.75	0.01
Fzd1	1.4	43.87	chr5:4533589..4533990	0	1.45		0.66	0.03
Gadd45b	46.96	527.61	chr10:80939652..80940053	0.06	1.28	chr10:80921882..80943397	0.68	0.02
Gca	5.69	14.26	chr2:62648663..62649064	0	1.62		0.22	0.52
Gm129	1.97	15.38	chr3:95643236..95643637	0.08	1.38	chr3:95624715..95679748	0.78	0
Gna13	75.95	261.68	chr11:109366844..109367245	0.36	4.66	chr11:109361361..109440261	0.73	0.01
Gpalpp1	31.59	57.05	chr14:76099566..76099967	0	1.68		0.61	0.05
Gpd2	21.3	118.76	chr2:57300411..57300812	0	2.63		0.55	0.09
Gspt1	62.17	162.45	chr16:11288180..11288581	0.13	1.88		0.8	0.01
Hbegf	0.39	16.83	chr18:36713377..36713778	0.24	6.25	chr18:36670073..36760404	0.43	0.19
Hbegf	0.39	16.83	chr18:36723611..36724012	0	2.3	chr18:36670073..36760404	0.59	0.05
Hif1a	96.22	554.07	chr12:73725720..73726121	0.16	11.61	chr12:73715766..73794428	0.52	0.1
Hif1a	96.22	554.07	chr12:73744801..73745202	0	1.92	chr12:73715766..73794428	0.42	0.2
Hif1a	96.22	554.07	chr12:73880378..73880779	0	6.53	chr12:73870564..73905455	0.03	0.93
Higd1a	35.03	93.15	chr9:123760174..123760575	0.1	2.82		0.47	0.14
Hilpda	13.91	705.96	chr6:29245811..29246212	0.05	2.58		0.87	0
Hilpda	13.91	705.96	chr6:29246505..29246906	0	2.13		0.81	0
Hilpda	13.91	705.96	chr6:29247085..29247486	0.1	1.99		0.66	0.03
Hilpda	13.91	705.96	chr6:29248364..29248765	0.1	4.77		0.92	0
Hilpda	13.91	705.96	chr6:29264325..29264726	0.03	1.24		0.51	0.11
Hivep1	5.63	52.67	chr13:42244281..42244682	0	1.08	chr13:42244288..42262608	0.76	0.01
Hivep1	5.63	52.67	chr13:42245593..42245994	0	3.76	chr13:42244288..42262608	0.57	0.07
Hivep1	5.63	52.67	chr13:42248616..42249017	0	1.67	chr13:42244288..42262608	0.42	0.19
Hk1	51.88	151.62	chr10:62066255..62066656	0	1.17		0.61	0.05
Hk1	51.88	151.62	chr10:62339215..62339616	0.03	1.47		0.74	0.01
Hk1	51.88	151.62	chr10:62503832..62504233	0.13	2.7	chr10:62501014..62509591	0.68	0.02
Hk3	77.93	284.96	chr13:55016581..55016982	0.24	3.66		0.63	0.04
Hspa1a	2.04	30.75	chr17:35208222..35208623	0	2.38	chr17:35164049..35220092	0.71	0.01
Hspa1a	2.04	30.75	chr17:35209769..35210170	0.18	3.93	chr17:35164049..35220092	0.91	0
Hspa1a	2.04	30.75	chr17:35210219..35210620	0.88	10.85	chr17:35164049..35220092	0.8	0.01
Hspa1b	0.84	6.46	chr17:35208222..35208623	0	2.38	chr17:35164049..35220092	0.35	0.3
Hspa1b	0.84	6.46	chr17:35209769..35210170	0.18	3.93	chr17:35164049..35220092	0.58	0.06
Hspa1b	0.84	6.46	chr17:35210219..35210620	0.88	10.85	chr17:35164049..35220092	0.49	0.13
Icam1	145.63	897.18	chr9:21361100..21361501	0.09	1.58		0.46	0.15
Id2	275.59	3075.23	chr12:25295775..25296176	0.16	1.59	chr12:25281422..25356922	0.73	0.01
Id2	275.59	3075.23	chr12:25303455..25303856	0	1.21	chr12:25281422..25356922	0.36	0.27
Ifih1	51.12	315.37	chr2:62648663..62649064	0	1.62		0.8	0
Igf2bp2	0.93	9.61	chr16:22116910..22117311	0	1.86	chr16:22095708..22145542	0.43	0.19
Igf2bp2	0.93	9.61	chr16:22124307..22124708	0.06	1.16	chr16:22095708..22145542	0.66	0.03
Il12a	0	55.11	chr3:68633525..68633926	0	1.71		0.68	0.02
Il1a	1.51	1799.61	chr2:129319955..129320356	0	1.06	chr2:129297176..129338882	0.89	0
Il1a	1.51	1799.61	chr2:129330649..129331050	0	1.31	chr2:129297176..129338882	0.9	0
Il1a	1.51	1799.61	chr2:129338243..129338644	0.05	1.42	chr2:129297176..129338882	0.72	0.01
Il1a	1.51	1799.61	chr2:129410351..129410752	0	2.09	chr2:129360005..129410870	0.62	0.04
Il1b	278.8	9004.58	chr2:129319955..129320356	0	1.06	chr2:129297176..129338882	0.66	0.03
Il1b	278.8	9004.58	chr2:129330649..129331050	0	1.31	chr2:129297176..129338882	0.69	0.02
Il1b	278.8	9004.58	chr2:129338243..129338644	0.05	1.42	chr2:129297176..129338882	0.63	0.04
Il1b	278.8	9004.58	chr2:129410351..129410752	0	2.09	chr2:129360005..129410870	0.48	0.14
Il1f6	0.04	7.07	chr2:24304532..24304933	0	1.44	chr2:24295006..24367810	0.65	0.03
Il1f6	0.04	7.07	chr2:24341391..24341792	0.32	4.66	chr2:24295006..24367810	0.76	0.01
Il1f9	0.76	34.79	chr2:24304532..24304933	0	1.44	chr2:24295006..24367810	0.79	0
Il1f9	0.76	34.79	chr2:24341391..24341792	0.32	4.66	chr2:24295006..24367810	0.61	0.05
Il1rn	75.95	8405.12	chr2:24304532..24304933	0	1.44	chr2:24295006..24367810	0.77	0.01
Il1rn	75.95	8405.12	chr2:24341391..24341792	0.32	4.66	chr2:24295006..24367810	0.63	0.04
Il27	0.24	627.04	chr7:126593766..126594167	0.06	1.23	chr7:126565746..126607357	0.38	0.25
Il6	0.52	1780.98	chr5:29861451..29861852	0.03	1.53		0.49	0.13
Il7r	90.27	221.76	chr15:9554300..9554701	0	1.54		0.5	0.12
Ilf3	22.77	52.53	chr9:21361100..21361501	0.09	1.58		0.26	0.45
Insl6	17.05	59.19	chr19:29253796..29254197	0.1	2.27	chr19:29201652..29256841	0.13	0.71
Insl6	17.05	59.19	chr19:29493287..29493688	0	2.23	chr19:29461249..29540485	0.3	0.37
Iqgap1	308.48	637.73	chr7:80774208..80774609	0.03	1.12	chr7:80753807..80789884	0.66	0.03
Irak2	54.17	183.51	chr6:113660389..113660790	0.53	9.88	chr6:113623913..113704389	0.55	0.09
Irg1	477.19	17287.8	chr14:103014778..103015179	0	4.71		0.84	0
Irg1	477.19	17287.8	chr14:103015885..103016286	0.05	3.13		0.51	0.11
Irg1	477.19	17287.8	chr14:103033398..103033799	0.93	13.35	chr14:103033318..103110163	0.46	0.15
Irg1	477.19	17287.8	chr14:103034101..103034502	0.08	1.34	chr14:103033318..103110163	0.22	0.51
Irg1	477.19	17287.8	chr14:103037012..103037413	1.48	36.68	chr14:103033318..103110163	0.59	0.06
Irg1	477.19	17287.8	chr14:103039353..103039754	0.05	4.89	chr14:103033318..103110163	0.77	0.01
Itgb1	241.69	430.77	chr8:128417746..128418147	0	1.07		0.63	0.04
Itgb8	0.24	36.74	chr12:119070448..119070849	0.03	3.06	chr12:119069748..119114342	0.78	0
Itgb8	0.24	36.74	chr12:119139486..119139887	0	2.26	chr12:119138418..119170550	0.83	0
Itgb8	0.24	36.74	chr12:119146467..119146868	0	1.5	chr12:119138418..119170550	0.83	0
Itgb8	0.24	36.74	chr12:119164136..119164537	0	1.51	chr12:119138418..119170550	0.63	0.04
Itgb8	0.24	36.74	chr12:119207071..119207472	0	1.08		0.69	0.02
Jak2	47.91	461.54	chr19:29176475..29176876	0.05	1.23	chr19:29126488..29189256	0.82	0
Jak2	47.91	461.54	chr19:29253796..29254197	0.1	2.27	chr19:29201652..29256841	0.58	0.07
Jak2	47.91	461.54	chr19:29371827..29372228	0.03	1.28	chr19:29354989..29448568	0.18	0.59
Jak2	47.91	461.54	chr19:29493287..29493688	0	2.23	chr19:29461249..29540485	0.42	0.2
Jarid2	74.01	133.91	chr13:43787285..43787686	0.03	1.38	chr13:43765089..43807711	0.66	0.03
Klf6	145.52	559.75	chr13:5787095..5787496	0	1.84	chr13:5767829..5789713	0.85	0
Klf6	145.52	559.75	chr13:5789313..5789714	0.1	8	chr13:5767829..5789713	0.86	0
Klf6	145.52	559.75	chr13:5802211..5802612	0.05	2.26		0.59	0.06
Lad1	0.75	31.37	chr1:135813078..135813479	0	3.54		0.87	0
Lancl3	1.47	15.71	chrX:9462056..9462457	1	15.89	chrX:9426842..9473786	0.23	0.5
Limd1	44.4	79.64	chr9:123722685..123723086	0	1.67		0.8	0
Limd1	44.4	79.64	chr9:123760174..123760575	0.1	2.82		0.8	0
Litaf	341.98	846.01	chr16:11288180..11288581	0.13	1.88		0.38	0.25
Lpar1	4.17	60.91	chr4:58470153..58470554	0.05	1.28		0.58	0.06
Lpp	15.98	28.57	chr16:24626167..24626568	0.05	1.61	chr16:24577680..24657266	0.43	0.18
Lpp	15.98	28.57	chr16:24910791..24911192	0.05	1.14	chr16:24859426..24920139	0.38	0.25
Lpp	15.98	28.57	chr16:25012993..25013394	0	1.18	chr16:25010781..25062096	0.49	0.13
Lpp	15.98	28.57	chr16:25041130..25041531	0.49	8.56	chr16:25010781..25062096	0.05	0.9
Lpp	15.98	28.57	chr16:25047799..25048200	0.37	5.24	chr16:25010781..25062096	0.45	0.16
Lrp12	41.1	91	chr15:40014621..40015022	0.03	2.47		0.86	0
Lrrc16a	3.39	13.08	chr13:24104040..24104441	0.16	4.66	chr13:24094748..24113995	0.35	0.29
Lrrc58	41.05	76.39	chr16:38395140..38395541	0	1.32	chr16:38346748..38476097	0.65	0.03
Lrrc8b	9.03	20.48	chr5:105800320..105800721	0.05	2.07		0.24	0.48
Lrrc8c	20.92	190.39	chr5:105800320..105800721	0.05	2.07		0.24	0.48
Lrrc8d	43.08	111.81	chr5:105800320..105800721	0.05	2.07		0.63	0.04
Lztfl1	10.84	144.43	chr9:123722685..123723086	0	1.67		0.8	0
Lztfl1	10.84	144.43	chr9:123760174..123760575	0.1	2.82		0.79	0
Magohb	21.23	60.86	chr6:129608354..129608755	0.09	1.2		0.76	0.01
Malt1	16.76	508.36	chr18:65381722..65382123	0.26	8.03	chr18:65375268..65497334	0.81	0
Malt1	16.76	508.36	chr18:65382443..65382844	0.05	1.61	chr18:65375268..65497334	0.82	0
Malt1	16.76	508.36	chr18:65416264..65416665	0	1.3	chr18:65375268..65497334	0.68	0.03
Map4k4	36.97	130.24	chr1:39583174..39583575	0	1.35	chr1:39577339..39651525	0.54	0.09
Map4k4	36.97	130.24	chr1:39851144..39851545	0.05	1.21		0.83	0
Mcl1	578.11	974.47	chr3:95643236..95643637	0.08	1.38	chr3:95624715..95679748	0.57	0.07
Mmp13	10.18	665.74	chr9:7221414..7221815	0.1	1.36	chr9:7221288..7272652	0.61	0.04
Mxd1	18.7	157.57	chr6:86570736..86571137	0	2.12	chr6:86570764..86585690	0.81	0
Myadm	104.04	296.14	chr7:3505824..3506225	0	1.1		0.33	0.33
Myef2	14.13	26.49	chr2:122408925..122409326	0.19	3.45	chr2:122407505..122454314	0.14	0.69
Naa25	27.03	66.56	chr5:121399560..121399961	0.25	6.04		0.42	0.2
Nampt	110.46	708.49	chr12:32815898..32816299	0.05	2.23		0.6	0.05
Ncoa5	17.89	44.42	chr2:165042996..165043397	0.1	2.71		0.67	0.02
Nfkb1	57.59	467.04	chr3:135688903..135689304	0.1	2.54	chr3:135623609..135730126	0.86	0
Nfkbia	190.15	1470.41	chr12:55466260..55466661	0.14	4.79	chr12:55415933..55499342	0.79	0
Niacr1	7.24	793.12	chr5:123862627..123863028	0	1.15	chr5:123858496..123915356	0.52	0.1
Niacr1	7.24	793.12	chr5:124496841..124497242	0.05	1.37	chr5:124442557..124498566	0.57	0.07
Nos2	10.27	1812.88	chr11:78876017..78876418	0	2.06	chr11:78846560..78889608	0.33	0.32
Nos2	10.27	1812.88	chr11:78889147..78889548	0	3.12	chr11:78846560..78889608	0.4	0.22
Nos2	10.27	1812.88	chr11:78916390..78916791	0.11	3.31		0.5	0.11
Nr4a2	1.01	10.68	chr2:57300411..57300812	0	2.63		0.24	0.47
Nrp2	220.5	508.7	chr1:62735795..62736196	0.03	2.64	chr1:62678728..62736966	0.25	0.47
Ntng2	2.83	20.9	chr2:29623929..29624330	0.03	1.28		0.36	0.28
Nufip1	35.39	85.21	chr14:76099566..76099967	0	1.68		0.6	0.05
Nup54	17.22	44.13	chr5:92369052..92369453	0	1.41	chr5:92348788..92394328	0.46	0.16
Odf2l	7.7	18.56	chr3:145103788..145104189	0.03	1.1		0.03	0.94
Osgin2	11.08	117.38	chr4:15990396..15990797	0.05	1.08		0.7	0.02
Osgin2	11.08	117.38	chr4:16160007..16160408	0.09	1.15		0.8	0
Patl1	35.48	96.53	chr19:11494532..11494933	0.16	2.07		0.46	0.16
Patl1	35.48	96.53	chr19:11809651..11810052	0	1.14		0.14	0.69
Pde4b	24.65	156.53	chr4:102572557..102572958	0.06	1.95	chr4:102547404..102659006	0.4	0.22
Pde4b	24.65	156.53	chr4:102608000..102608401	0.03	2.08	chr4:102547404..102659006	0.75	0.01
Pde4b	24.65	156.53	chr4:102624141..102624542	0.1	1.7	chr4:102547404..102659006	0.71	0.02
Pdgfrl	0.04	1.56	chr8:40584683..40585084	0.21	4.72	chr8:40584597..40612504	0.44	0.18
Pdgfrl	0.04	1.56	chr8:40597912..40598313	0.18	4.09	chr8:40584597..40612504	0.28	0.4
Pdlim7	7.65	22.13	chr13:55016581..55016982	0.24	3.66		0.1	0.77
Pdpn	29.7	834.58	chr4:143288863..143289264	0	2.26	chr4:143238860..143305559	0.43	0.18
Piezo1	40.35	157.06	chr8:122555970..122556371	0.1	1.7	chr8:122535576..122612565	0.73	0.02
Pim1	73.07	516.75	chr17:29393637..29394038	0.1	5.13		0.85	0
Pim1	73.07	516.75	chr17:29394116..29394517	0	1.41	chr17:29394048..29395809	0.64	0.04
Pim1	73.07	516.75	chr17:29441994..29442395	0.11	2.04	chr17:29431937..29447550	0.29	0.38
Pip5k1a	9.28	17	chr3:95643236..95643637	0.08	1.38	chr3:95624715..95679748	0.55	0.08
Pla2g4a	17.61	111.15	chr1:149946916..149947317	0.08	1.63	chr1:149940143..149975776	0.21	0.55
Pla2g4a	17.61	111.15	chr1:149947631..149948032	0.1	1.17	chr1:149940143..149975776	0.72	0.01
Pla2g4a	17.61	111.15	chr1:149949338..149949739	0	1.12	chr1:149940143..149975776	0.45	0.16
Pla2g4a	17.61	111.15	chr1:150203036..150203437	0	3.91		0.62	0.04
Plek	175.62	2075.42	chr11:16998881..16999282	0.06	1.61	chr11:16951038..17013307	0.26	0.44
Plk2	50.22	770.18	chr13:110601850..110602251	0.09	1.2		0.64	0.03
Plxna1	111.66	251.37	chr6:89391821..89392222	0.05	1.09	chr6:89364387..89431093	0.22	0.52
Ppap2b	5.97	90.34	chr4:105220889..105221290	0	1.23	chr4:105206927..105291922	0.36	0.27
Ppap2b	5.97	90.34	chr4:105268754..105269155	0.1	1.35	chr4:105206927..105291922	0.43	0.19
Ppap2b	5.97	90.34	chr4:105286246..105286647	0	1.63	chr4:105206927..105291922	0.48	0.13
Prkrip1	25.6	45.37	chr5:136034913..136035314	0.1	3.15		0.61	0.05
Psd4	36.4	103.53	chr2:24304532..24304933	0	1.44	chr2:24295006..24367810	0.57	0.07
Psd4	36.4	103.53	chr2:24341391..24341792	0.32	4.66	chr2:24295006..24367810	0.54	0.09
Psma6	84.34	214.72	chr12:55466260..55466661	0.14	4.79	chr12:55415933..55499342	0.7	0.02
Psmd14	75.42	135.92	chr2:62648663..62649064	0	1.62		0.76	0.01
Psmd8	320.44	831.41	chr7:29042137..29042538	0	1.91		0.45	0.17
Ptafr	252.87	566.27	chr4:132591282..132591683	0.1	1.5	chr4:132588453..132638966	0.51	0.11
Ptafr	252.87	566.27	chr4:132748711..132749112	0	1.83	chr4:132747558..132820527	0.44	0.18
Ptgs2	4.93	13080.1	chr1:149946916..149947317	0.08	1.63	chr1:149940143..149975776	0.67	0.03
Ptgs2	4.93	13080.1	chr1:149947631..149948032	0.1	1.17	chr1:149940143..149975776	0.55	0.08
Ptgs2	4.93	13080.1	chr1:149949338..149949739	0	1.12	chr1:149940143..149975776	0.31	0.36
Ptgs2	4.93	13080.1	chr1:150203036..150203437	0	3.91		0.83	0
Ralgds	27.44	248.06	chr2:28524390..28524791	0.15	3.02	chr2:28517247..28548173	0.7	0.02
Rapgef1	18.95	39.16	chr2:29621144..29621545	0.11	4.56		0.63	0.04
Rapgef1	18.95	39.16	chr2:29623929..29624330	0.03	1.28		0.55	0.08
Rasa2	7.74	22.21	chr9:96782100..96782501	0.13	2.34		0.13	0.71
Rasgef1b	83.29	381.64	chr5:99336450..99336851	0.05	1.58		0.24	0.48
Rasgef1b	83.29	381.64	chr5:99358002..99358403	0	1.38	chr5:99358043..99395596	0.61	0.05
Rbbp8	7.47	49.82	chr18:11697703..11698104	0	2.1		0.51	0.11
Rbms1	98.01	249.75	chr2:60948266..60948667	0.13	2.21		0.18	0.59
Rbpj	98.72	295.72	chr5:53382051..53382452	0.13	1.81	chr5:53375737..53438207	0.25	0.45
Rcl1	15.14	45.5	chr19:29176475..29176876	0.05	1.23	chr19:29126488..29189256	0.59	0.05
Rcl1	15.14	45.5	chr19:29253796..29254197	0.1	2.27	chr19:29201652..29256841	0.21	0.54
Rel	24.23	165.3	chr11:23754281..23754682	0.03	1.55	chr11:23734117..23771746	0.71	0.02
Rela	103.87	309.04	chr19:5925501..5925902	0.08	2.83		0.69	0.02
Rela	103.87	309.04	chr19:5931597..5931998	0.08	1.32		0.51	0.11
Rffl	10.24	50.89	chr11:83043958..83044359	0.06	1.98	chr11:83039103..83065258	0.8	0
Rffl	10.24	50.89	chr11:83045539..83045940	0.31	5.39	chr11:83039103..83065258	0.89	0
Rgl1	11.65	73.45	chr1:152540545..152540946	0.16	2.39	chr1:152528718..152540969	0.77	0.01
Rgl1	11.65	73.45	chr1:152581110..152581511	0.03	1.13		0.22	0.52
Rilpl2	145.59	263.39	chr5:123862627..123863028	0	1.15	chr5:123858496..123915356	0.58	0.06
Rilpl2	145.59	263.39	chr5:124496841..124497242	0.05	1.37	chr5:124442557..124498566	0.64	0.03
Riok3	50.45	128.8	chr18:12131250..12131651	0.03	3.09		0.61	0.05
Ripk2	31.06	297.51	chr4:15990396..15990797	0.05	1.08		0.6	0.05
Ripk2	31.06	297.51	chr4:16160007..16160408	0.09	1.15		0.78	0
Rps6ka2	6.21	33.24	chr17:7163895..7164296	0	1.42		0.95	0
Rsrc2	51.44	104.03	chr5:123862627..123863028	0	1.15	chr5:123858496..123915356	0.58	0.06
Rsrc2	51.44	104.03	chr5:124496841..124497242	0.05	1.37	chr5:124442557..124498566	0.54	0.09
Runx3	0.06	2.77	chr4:135312667..135313068	0.11	2.96		0.56	0.08
Sap30	55.16	229.06	chr8:57589367..57589768	0.03	1.25	chr8:57576118..57602244	0.65	0.03
Setd8	35.57	68.45	chr5:123862627..123863028	0	1.15	chr5:123858496..123915356	0.39	0.24
Setd8	35.57	68.45	chr5:124496841..124497242	0.05	1.37	chr5:124442557..124498566	0.06	0.87
Sf1	101.72	177.73	chr19:5925501..5925902	0.08	2.83		0.76	0.01
Sf1	101.72	177.73	chr19:5931597..5931998	0.08	1.32		0.46	0.15
Sh2b2	1.51	12.21	chr5:136034913..136035314	0.1	3.15		0.58	0.07
Sh3glb1	192.53	367.4	chr3:145103788..145104189	0.03	1.1		0.39	0.24
Slamf1	0.24	95.16	chr1:171643625..171644026	0.03	1.63	chr1:171594053..171666069	0.04	0.9
Slamf1	0.24	95.16	chr1:171661728..171662129	0	1.2	chr1:171594053..171666069	0.25	0.46
Slamf7	55.37	1230.46	chr1:171629569..171629970	0.03	2.35	chr1:171594053..171666069	0.27	0.43
Slamf7	55.37	1230.46	chr1:171643625..171644026	0.03	1.63	chr1:171594053..171666069	0.49	0.13
Slamf7	55.37	1230.46	chr1:171661728..171662129	0	1.2	chr1:171594053..171666069	0.74	0.01
Slc15a3	128.97	813.9	chr19:10845353..10845754	0.2	8.41	chr19:10831236..10845848	0.69	0.02
Slc20a1	48.4	178.35	chr2:129319955..129320356	0	1.06	chr2:129297176..129338882	0.73	0.01
Slc20a1	48.4	178.35	chr2:129330649..129331050	0	1.31	chr2:129297176..129338882	0.67	0.02
Slc20a1	48.4	178.35	chr2:129338243..129338644	0.05	1.42	chr2:129297176..129338882	0.12	0.72
Slc20a1	48.4	178.35	chr2:129410351..129410752	0	2.09	chr2:129360005..129410870	0.24	0.47
Slc23a2	47.53	122.71	chr2:132150888..132151289	0	1.17		0.47	0.15
Slc25a25	13.12	33	chr2:31442469..31442870	0.05	1.31		0.43	0.19
Slc30a6	19.33	35.23	chr17:74523187..74523588	0.03	1.07		0.32	0.34
Slc7a2	18.62	938.65	chr8:40584683..40585084	0.21	4.72	chr8:40584597..40612504	0.73	0.02
Slc7a2	18.62	938.65	chr8:40597912..40598313	0.18	4.09	chr8:40584597..40612504	0.56	0.07
Slco3a1	6.62	53.04	chr7:74684005..74684406	0.03	1.38	chr7:74645618..74693434	0.53	0.1
Slfn2	532.64	2722.7	chr11:83043958..83044359	0.06	1.98	chr11:83039103..83065258	0.37	0.27
Slfn2	532.64	2722.7	chr11:83045539..83045940	0.31	5.39	chr11:83039103..83065258	0.51	0.11
Slfn3	9.65	31.18	chr11:83043958..83044359	0.06	1.98	chr11:83039103..83065258	0.27	0.43
Slfn3	9.65	31.18	chr11:83045539..83045940	0.31	5.39	chr11:83039103..83065258	0.46	0.15
Slfn5	237.81	717.59	chr11:83043958..83044359	0.06	1.98	chr11:83039103..83065258	0.3	0.37
Slfn5	237.81	717.59	chr11:83045539..83045940	0.31	5.39	chr11:83039103..83065258	0.46	0.15
Slfn8	148.48	505.17	chr11:83043958..83044359	0.06	1.98	chr11:83039103..83065258	0.27	0.43
Slfn8	148.48	505.17	chr11:83045539..83045940	0.31	5.39	chr11:83039103..83065258	0.41	0.22
Snn	2.4	12.2	chr16:11288180..11288581	0.13	1.88		0.63	0.04
Snrnp35	13.04	32.86	chr5:123862627..123863028	0	1.15	chr5:123858496..123915356	0.31	0.35
Snrnp35	13.04	32.86	chr5:124496841..124497242	0.05	1.37	chr5:124442557..124498566	0.72	0.01
Snx18	41.41	145.82	chr13:113435124..113435525	0	1.14	chr13:113418101..113470616	0.85	0
Snx18	41.41	145.82	chr13:113613907..113614308	0.13	2.89		0.62	0.05
Socs1	4.38	233.24	chr16:11288180..11288581	0.13	1.88		0.75	0.01
Socs3	58.81	1520.05	chr11:117946326..117946727	0.05	1.09	chr11:117935642..117947007	0.67	0.03
Socs3	58.81	1520.05	chr11:117979333..117979734	0	1.3	chr11:117959840..117992253	0.76	0.01
Socs3	58.81	1520.05	chr11:117987997..117988398	0.05	5.58	chr11:117959840..117992253	0.83	0
Socs3	58.81	1520.05	chr11:117991749..117992150	0.06	3.25	chr11:117959840..117992253	0.72	0.01
Socs3	58.81	1520.05	chr11:118018918..118019319	0.14	1.99		0.4	0.22
Specc1	2.14	36.46	chr11:62187090..62187491	0.03	1.41		0.33	0.33
Spred1	62.83	232.2	chr2:117298926..117299327	0.05	2.45		0.35	0.3
Sptlc2	63.56	153.8	chr12:86824990..86825391	0.05	1.18	chr12:86818966..86834990	0.67	0.02
Src	24.6	179.7	chr2:157407585..157407986	0	1.63	chr2:157362899..157428848	0.64	0.03
Src	24.6	179.7	chr2:157425669..157426070	0.03	1.09	chr2:157362899..157428848	0.46	0.15
Src	24.6	179.7	chr2:157428230..157428631	0	1.2	chr2:157362899..157428848	0.64	0.03
Srfbp1	13.99	33.91	chr18:50398110..50398511	0.1	1.21		0.21	0.54
Srgn	204.01	2559.97	chr10:62066255..62066656	0	1.17		0.75	0.01
Srgn	204.01	2559.97	chr10:62339215..62339616	0.03	1.47		0.6	0.05
Srgn	204.01	2559.97	chr10:62503832..62504233	0.13	2.7	chr10:62501014..62509591	0.78	0
Srsf3	34.49	83.63	chr17:29441994..29442395	0.11	2.04	chr17:29431937..29447550	0.8	0
St3gal5	59.49	347.09	chr6:72023555..72023956	0	1.47	chr6:71950705..72064203	0.7	0.02
St3gal5	59.49	347.09	chr6:72037495..72037896	0.05	2.55	chr6:71950705..72064203	0.68	0.02
Stx3	28.17	62.66	chr19:11494532..11494933	0.16	2.07		0.31	0.35
Stx3	28.17	62.66	chr19:11809651..11810052	0	1.14		0.36	0.28
Tap1	63.89	337.76	chr17:35208222..35208623	0	2.38	chr17:35164049..35220092	0.42	0.2
Tap1	63.89	337.76	chr17:35209769..35210170	0.18	3.93	chr17:35164049..35220092	0.22	0.52
Tap1	63.89	337.76	chr17:35210219..35210620	0.88	10.85	chr17:35164049..35220092	0.49	0.13
Tap2	43.17	123.18	chr17:35208222..35208623	0	2.38	chr17:35164049..35220092	0.56	0.08
Tap2	43.17	123.18	chr17:35209769..35210170	0.18	3.93	chr17:35164049..35220092	0.5	0.12
Tap2	43.17	123.18	chr17:35210219..35210620	0.88	10.85	chr17:35164049..35220092	0.58	0.07
Tapt1	9.62	21.57	chr5:43865294..43865695	0.1	1.54		0.45	0.17
Tapt1	9.62	21.57	chr5:43866391..43866792	0	1.29		0.58	0.06
Tapt1	9.62	21.57	chr5:43881862..43882263	0.1	4.11		0.3	0.38
Tarm1	0.79	137.12	chr7:3505824..3506225	0	1.1		0.25	0.45
Tbc1d9	43.63	187.38	chr8:83144616..83145017	0.05	1.14		0.23	0.5
Tlr6	6.1	10.99	chr5:64885038..64885439	0.14	2.27	chr5:64834128..64933732	0.63	0.04
Tlr6	6.1	10.99	chr5:64886136..64886537	0.11	1.23	chr5:64834128..64933732	0.68	0.02
Tma16	34.06	323.53	chr8:66490660..66491061	0.29	3.86		0.41	0.21
Tmcc3	3.84	22.01	chr10:94961373..94961774	0.03	1.91	chr10:94909280..94967685	0.34	0.31
Tnc	0.1	58.33	chr4:63407673..63408074	0	1.37	chr4:63385234..63430063	0.59	0.06
Tnf	68.09	6941.54	chr17:35208222..35208623	0	2.38	chr17:35164049..35220092	0.56	0.08
Tnf	68.09	6941.54	chr17:35209769..35210170	0.18	3.93	chr17:35164049..35220092	0.84	0
Tnf	68.09	6941.54	chr17:35210219..35210620	0.88	10.85	chr17:35164049..35220092	0.79	0.01
Tnfaip2	80.98	466.1	chr12:111436648..111437049	0.13	4.07	chr12:111429844..111456322	0.35	0.3
Tnfaip3	28.99	716.67	chr10:18946470..18946871	0	1.75	chr10:18917211..18971987	0.84	0
Tnfaip3	28.99	716.67	chr10:18996362..18996763	0.28	3.59		0.74	0.01
Tnfaip3	28.99	716.67	chr10:19063423..19063824	0	1.86	chr10:19009174..19140492	0.87	0
Tnfrsf1b	701.88	2704.53	chr4:145236110..145236511	0.06	1.21	chr4:145233680..145283845	0.28	0.4
Tnfrsf1b	701.88	2704.53	chr4:145242976..145243377	0.14	2.35	chr4:145233680..145283845	0.46	0.15
Tnfrsf1b	701.88	2704.53	chr4:145245568..145245969	1.93	28.79	chr4:145233680..145283845	0.73	0.02
Tnfrsf1b	701.88	2704.53	chr4:145257358..145257759	0.03	2.39	chr4:145233680..145283845	0.58	0.06
Tnfrsf1b	701.88	2704.53	chr4:145258082..145258483	0.44	8.4	chr4:145233680..145283845	0.54	0.09
Tnfrsf1b	701.88	2704.53	chr4:145260068..145260469	0	2.96	chr4:145233680..145283845	0.74	0.01
Tnfrsf1b	701.88	2704.53	chr4:145272660..145273061	0.1	5.16	chr4:145233680..145283845	0.84	0
Tnfrsf1b	701.88	2704.53	chr4:145283432..145283833	0.13	1.86	chr4:145233680..145283845	0.51	0.11
Tnfsf15	1.36	467.99	chr4:63407673..63408074	0	1.37	chr4:63385234..63430063	0.63	0.04
Tnfsf9	3.42	311.87	chr17:57292286..57292687	0.16	2.54		0.83	0
Tnip1	107.38	565.32	chr11:54954059..54954460	0	1.73	chr11:54920995..55050167	0.46	0.15
Traf5	13.91	28.18	chr1:191180436..191180837	0.15	2.38	chr1:191180349..191201638	0.34	0.31
Traf5	13.91	28.18	chr1:191189816..191190217	0.14	2.91	chr1:191180349..191201638	0.21	0.54
Traf5	13.91	28.18	chr1:191193641..191194042	0	1.3	chr1:191180349..191201638	0.63	0.04
Traf5	13.91	28.18	chr1:191239599..191240000	0.08	3.1	chr1:191216017..191299892	0.71	0.02
Traf5	13.91	28.18	chr1:191439670..191440071	0	1.09		0.33	0.33
Trafd1	102.58	203.63	chr5:121399560..121399961	0.25	6.04		0.76	0.01
Trim30a	23.32	86.82	chr7:104398451..104398852	0.03	1.56		0.48	0.14
Trim34a	30.42	76.9	chr7:104398451..104398852	0.03	1.56		0.47	0.15
Trim35	78.15	180.74	chr14:66279516..66279917	0.27	3.41	chr14:66175780..66281301	0.36	0.28
Trip10	12.31	38.08	chr17:57292286..57292687	0.16	2.54		0.91	0
Trip12	49.2	90.32	chr1:84242296..84242697	0.09	1.48		0.5	0.12
Tshz1	5.77	41.44	chr18:83812728..83813129	0	1.54	chr18:83804478..83841228	0.16	0.65
Tshz1	5.77	41.44	chr18:83817407..83817808	0.03	1.09	chr18:83804478..83841228	0.64	0.03
Tshz1	5.77	41.44	chr18:84089317..84089718	0.05	1.11		0.58	0.06
Ttc19	4.55	11.1	chr11:62184954..62185355	0.1	1.79		0.38	0.25
Ttc19	4.55	11.1	chr11:62187090..62187491	0.03	1.41		0.21	0.54
Ttc39c	16.3	63.2	chr18:12131250..12131651	0.03	3.09		0.6	0.05
Ubb	22.98	42.29	chr11:62184954..62185355	0.1	1.79		0.08	0.82
Ubb	22.98	42.29	chr11:62187090..62187491	0.03	1.41		0.08	0.82
Ube2d3	382.35	942.29	chr3:135688903..135689304	0.1	2.54	chr3:135623609..135730126	0.39	0.23
Ube2l3	5.46	11.47	chr16:17467711..17468112	0.03	9.02		0.38	0.25
Uso1	19.05	37.63	chr5:92369052..92369453	0	1.41	chr5:92348788..92394328	0.34	0.3
Vps37b	13.61	27.76	chr5:123862627..123863028	0	1.15	chr5:123858496..123915356	0.5	0.12
Vps37b	13.61	27.76	chr5:124496841..124497242	0.05	1.37	chr5:124442557..124498566	0.27	0.41
Vps37c	32.95	58.18	chr19:10845353..10845754	0.2	8.41	chr19:10831236..10845848	0.74	0.01
Wdr43	34.89	76.29	chr17:71259730..71260131	0.18	2.97	chr17:71250721..71311254	0.37	0.26
Wfdc17	248.01	1070.59	chr11:83534208..83534609	0.03	1.99	chr11:83509514..83619461	0.43	0.19
Wfdc17	248.01	1070.59	chr11:83534669..83535070	0	2.61	chr11:83509514..83619461	0.35	0.29
Wfdc17	248.01	1070.59	chr11:83536277..83536678	0	1.67	chr11:83509514..83619461	0.24	0.47
Wsb1	111.19	265.89	chr11:78876017..78876418	0	2.06	chr11:78846560..78889608	0.43	0.18
Wsb1	111.19	265.89	chr11:78889147..78889548	0	3.12	chr11:78846560..78889608	0.3	0.38
Xkr8	4.44	64.82	chr4:132591282..132591683	0.1	1.5	chr4:132588453..132638966	0.11	0.75
Xkr8	4.44	64.82	chr4:132748711..132749112	0	1.83	chr4:132747558..132820527	0.83	0
Ywhag	158.04	305.93	chr5:136034913..136035314	0.1	3.15		0.79	0.01
Zc3h13	25.99	46.02	chr14:75172296..75172697	0.08	1.48	chr14:75163897..75196001	0.13	0.71
Zc3h7a	40.33	125.08	chr16:11288180..11288581	0.13	1.88		0.7	0.02
Zfp407	7.44	14.8	chr18:83812728..83813129	0	1.54	chr18:83804478..83841228	0.37	0.27
Zfp407	7.44	14.8	chr18:83817407..83817808	0.03	1.09	chr18:83804478..83841228	0.35	0.29
Zfp407	7.44	14.8	chr18:84089317..84089718	0.05	1.11		0.52	0.1
