# Supplementary material for: Transcriptionally induced enhancers in the macrophage immune response to Mycobacterium tuberculosis infection
Source: BMC Genomics. 2019 Jan 22;20:71. doi: 10.1186/s12864-019-5450-6 (PMC6341744; doi:10.1186/s12864-019-5450-6)
Supplement: Supplementary file 10 — Figure S6. Regulation of Irg1, Cln5, and Fbxl3 genes. (XLSX 12 kb) [file 12864_2019_5450_MOESM10_ESM.xlsx]

## Sheet: Table_S6
KEGG pathway map	Map Size	Overlap with query gene list	P-value	FDR
TNF signaling pathway	Creb5	chr6:53626056..53626457	0.69	0.02
TNF signaling pathway	Cxcl1	chr5:90875989..90876390	0.78	0.005
TNF signaling pathway	Cxcl1	chr5:90880890..90881291	0.69	0.019
TNF signaling pathway	Cxcl1	chr5:90900213..90900614	0.56	0.073
TNF signaling pathway	Cxcl1	chr5:90900701..90901102	0.8	0.003
TNF signaling pathway	Cxcl10	chr5:92369052..92369453	0.8	0.003
TNF signaling pathway	Cxcl2	chr5:90875989..90876390	0.77	0.006
TNF signaling pathway	Cxcl2	chr5:90880890..90881291	0.71	0.015
TNF signaling pathway	Cxcl2	chr5:90900213..90900614	0.75	0.008
TNF signaling pathway	Cxcl2	chr5:90900701..90901102	0.9	0
TNF signaling pathway	Cxcl3	chr5:90875989..90876390	0.31	0.346
TNF signaling pathway	Cxcl3	chr5:90880890..90881291	0.57	0.067
TNF signaling pathway	Cxcl3	chr5:90900213..90900614	0.19	0.57
TNF signaling pathway	Cxcl3	chr5:90900701..90901102	0.26	0.449
TNF signaling pathway	Edn1	chr13:42244281..42244682	0.37	0.266
TNF signaling pathway	Edn1	chr13:42245593..42245994	0.74	0.009
TNF signaling pathway	Edn1	chr13:42248616..42249017	0.92	0
TNF signaling pathway	Icam1	chr9:21361100..21361501	0.46	0.154
TNF signaling pathway	Il1b	chr2:129319955..129320356	0.66	0.027
TNF signaling pathway	Il1b	chr2:129330649..129331050	0.69	0.019
TNF signaling pathway	Il1b	chr2:129338243..129338644	0.63	0.036
TNF signaling pathway	Il1b	chr2:129410351..129410752	0.48	0.137
TNF signaling pathway	Il6	chr5:29861451..29861852	0.49	0.127
TNF signaling pathway	Nfkb1	chr3:135688903..135689304	0.86	0.001
TNF signaling pathway	Nfkbia	chr12:55466260..55466661	0.79	0.004
TNF signaling pathway	Ptgs2	chr1:149946916..149947317	0.67	0.026
TNF signaling pathway	Ptgs2	chr1:149947631..149948032	0.55	0.078
TNF signaling pathway	Ptgs2	chr1:149949338..149949739	0.31	0.361
TNF signaling pathway	Ptgs2	chr1:150203036..150203437	0.83	0.002
TNF signaling pathway	Rela	chr19:5925501..5925902	0.69	0.023
TNF signaling pathway	Rela	chr19:5931597..5931998	0.51	0.114
TNF signaling pathway	Socs3	chr11:117946326..117946727	0.67	0.028
TNF signaling pathway	Socs3	chr11:117979333..117979734	0.76	0.006
TNF signaling pathway	Socs3	chr11:117987997..117988398	0.83	0.001
TNF signaling pathway	Socs3	chr11:117991749..117992150	0.72	0.013
TNF signaling pathway	Socs3	chr11:118018918..118019319	0.4	0.222
TNF signaling pathway	Tnf	chr17:35208222..35208623	0.56	0.076
TNF signaling pathway	Tnf	chr17:35209769..35210170	0.84	0.001
TNF signaling pathway	Tnf	chr17:35210219..35210620	0.79	0.006
TNF signaling pathway	Tnfaip3	chr10:18946470..18946871	0.84	0.001
TNF signaling pathway	Tnfaip3	chr10:18996362..18996763	0.74	0.01
TNF signaling pathway	Tnfaip3	chr10:19063423..19063824	0.87	0.001
TNF signaling pathway	Tnfrsf1b	chr4:145236110..145236511	0.28	0.397
TNF signaling pathway	Tnfrsf1b	chr4:145242976..145243377	0.46	0.154
TNF signaling pathway	Tnfrsf1b	chr4:145245568..145245969	0.73	0.015
TNF signaling pathway	Tnfrsf1b	chr4:145257358..145257759	0.58	0.063
TNF signaling pathway	Tnfrsf1b	chr4:145258082..145258483	0.54	0.094
TNF signaling pathway	Tnfrsf1b	chr4:145260068..145260469	0.74	0.01
TNF signaling pathway	Tnfrsf1b	chr4:145272660..145273061	0.84	0.003
TNF signaling pathway	Tnfrsf1b	chr4:145283432..145283833	0.51	0.113
TNF signaling pathway	Traf5	chr1:191180436..191180837	0.34	0.313
TNF signaling pathway	Traf5	chr1:191189816..191190217	0.21	0.539
TNF signaling pathway	Traf5	chr1:191193641..191194042	0.63	0.036
TNF signaling pathway	Traf5	chr1:191239599..191240000	0.71	0.015
TNF signaling pathway	Traf5	chr1:191439670..191440071	0.33	0.327
NF-kappa B signaling pathway	Ccl4	chr11:83534208..83534609	0.36	0.279
NF-kappa B signaling pathway	Ccl4	chr11:83534669..83535070	0.15	0.662
NF-kappa B signaling pathway	Ccl4	chr11:83536277..83536678	0.2	0.565
NF-kappa B signaling pathway	Ccl4	chr11:83543929..83544330	0.27	0.414
NF-kappa B signaling pathway	Cd14	chr18:36713377..36713778	0.64	0.04
NF-kappa B signaling pathway	Cd14	chr18:36723611..36724012	0.66	0.027
NF-kappa B signaling pathway	Cd40	chr2:165042996..165043397	0.76	0.006
NF-kappa B signaling pathway	Cxcl2	chr5:90875989..90876390	0.77	0.006
NF-kappa B signaling pathway	Cxcl2	chr5:90880890..90881291	0.71	0.015
NF-kappa B signaling pathway	Cxcl2	chr5:90900213..90900614	0.75	0.008
NF-kappa B signaling pathway	Cxcl2	chr5:90900701..90901102	0.9	0
NF-kappa B signaling pathway	Gadd45b	chr10:80939652..80940053	0.68	0.022
NF-kappa B signaling pathway	Icam1	chr9:21361100..21361501	0.46	0.154
NF-kappa B signaling pathway	Il1b	chr2:129319955..129320356	0.66	0.027
NF-kappa B signaling pathway	Il1b	chr2:129330649..129331050	0.69	0.019
NF-kappa B signaling pathway	Il1b	chr2:129338243..129338644	0.63	0.036
NF-kappa B signaling pathway	Il1b	chr2:129410351..129410752	0.48	0.137
NF-kappa B signaling pathway	Malt1	chr18:65381722..65382123	0.81	0.004
NF-kappa B signaling pathway	Malt1	chr18:65382443..65382844	0.82	0.002
NF-kappa B signaling pathway	Malt1	chr18:65416264..65416665	0.68	0.025
NF-kappa B signaling pathway	Nfkb1	chr3:135688903..135689304	0.86	0.001
NF-kappa B signaling pathway	Nfkbia	chr12:55466260..55466661	0.79	0.004
NF-kappa B signaling pathway	Ptgs2	chr1:149946916..149947317	0.67	0.026
NF-kappa B signaling pathway	Ptgs2	chr1:149947631..149948032	0.55	0.078
NF-kappa B signaling pathway	Ptgs2	chr1:149949338..149949739	0.31	0.361
NF-kappa B signaling pathway	Ptgs2	chr1:150203036..150203437	0.83	0.002
NF-kappa B signaling pathway	Rela	chr19:5925501..5925902	0.69	0.023
NF-kappa B signaling pathway	Rela	chr19:5931597..5931998	0.51	0.114
NF-kappa B signaling pathway	Tnf	chr17:35208222..35208623	0.56	0.076
NF-kappa B signaling pathway	Tnf	chr17:35209769..35210170	0.84	0.001
NF-kappa B signaling pathway	Tnf	chr17:35210219..35210620	0.79	0.006
NF-kappa B signaling pathway	Tnfaip3	chr10:18946470..18946871	0.84	0.001
NF-kappa B signaling pathway	Tnfaip3	chr10:18996362..18996763	0.74	0.01
NF-kappa B signaling pathway	Tnfaip3	chr10:19063423..19063824	0.87	0.001
NF-kappa B signaling pathway	Traf5	chr1:191180436..191180837	0.34	0.313
NF-kappa B signaling pathway	Traf5	chr1:191189816..191190217	0.21	0.539
NF-kappa B signaling pathway	Traf5	chr1:191193641..191194042	0.63	0.036
NF-kappa B signaling pathway	Traf5	chr1:191239599..191240000	0.71	0.015
NF-kappa B signaling pathway	Traf5	chr1:191439670..191440071	0.33	0.327
Tuberculosis	Cd14	chr18:36713377..36713778	0.64	0.04
Tuberculosis	Cd14	chr18:36723611..36724012	0.66	0.027
Tuberculosis	Eea1	chr10:96094001..96094402	0.09	0.797
Tuberculosis	Il12a	chr3:68633525..68633926	0.68	0.022
Tuberculosis	Il1a	chr2:129319955..129320356	0.89	0
Tuberculosis	Il1a	chr2:129330649..129331050	0.9	0
Tuberculosis	Il1a	chr2:129338243..129338644	0.72	0.012
Tuberculosis	Il1a	chr2:129410351..129410752	0.62	0.042
Tuberculosis	Il1b	chr2:129319955..129320356	0.66	0.027
Tuberculosis	Il1b	chr2:129330649..129331050	0.69	0.019
Tuberculosis	Il1b	chr2:129338243..129338644	0.63	0.036
Tuberculosis	Il1b	chr2:129410351..129410752	0.48	0.137
Tuberculosis	Il6	chr5:29861451..29861852	0.49	0.127
Tuberculosis	Irak2	chr6:113660389..113660790	0.55	0.087
Tuberculosis	Jak2	chr19:29176475..29176876	0.82	0.002
Tuberculosis	Jak2	chr19:29253796..29254197	0.58	0.066
Tuberculosis	Jak2	chr19:29371827..29372228	0.18	0.593
Tuberculosis	Jak2	chr19:29493287..29493688	0.42	0.197
Tuberculosis	Malt1	chr18:65381722..65382123	0.81	0.004
Tuberculosis	Malt1	chr18:65382443..65382844	0.82	0.002
Tuberculosis	Malt1	chr18:65416264..65416665	0.68	0.025
Tuberculosis	Nfkb1	chr3:135688903..135689304	0.86	0.001
Tuberculosis	Nos2	chr11:78876017..78876418	0.33	0.321
Tuberculosis	Nos2	chr11:78889147..78889548	0.4	0.222
Tuberculosis	Nos2	chr11:78916390..78916791	0.5	0.113
Tuberculosis	Rela	chr19:5925501..5925902	0.69	0.023
Tuberculosis	Rela	chr19:5931597..5931998	0.51	0.114
Tuberculosis	Ripk2	chr4:15990396..15990797	0.6	0.05
Tuberculosis	Ripk2	chr4:16160007..16160408	0.78	0.004
Tuberculosis	Src	chr2:157407585..157407986	0.64	0.035
Tuberculosis	Src	chr2:157425669..157426070	0.46	0.154
Tuberculosis	Src	chr2:157428230..157428631	0.64	0.034
Tuberculosis	Tlr6	chr5:64885038..64885439	0.63	0.037
Tuberculosis	Tlr6	chr5:64886136..64886537	0.68	0.02
Tuberculosis	Tnf	chr17:35208222..35208623	0.56	0.076
Tuberculosis	Tnf	chr17:35209769..35210170	0.84	0.001
Tuberculosis	Tnf	chr17:35210219..35210620	0.79	0.006
